# Supplementary material for: Cigarette smoke extract profoundly suppresses TNFα-mediated proinflammatory gene expression through upregulation of ATF3 in human coronary artery endothelial cells
Source: PubMed Central journal article supplement (PMC5216376; doi:10.1038/srep39945), 2017-01-06
Supplement: srep39945-s1.pdf [file srep39945-s1.pdf]

## Supplementary data

### Cigarette smoke extract profoundly suppresses TNF $\alpha$ -mediated proinflammatory gene expression through upregulation of ATF3 in human coronary artery endothelial cells

Jack E. Teasdale<sup>1</sup>, Georgina G. J. Hazell<sup>1</sup>, Alasdair M. G. Peachey<sup>1</sup>, Graciela B. Sala-Newby<sup>1</sup>, Charles C. T. Hindmarch<sup>2</sup>, Tristan R. McKay<sup>3</sup>, Mark Bond<sup>1</sup>, Andrew C. Newby<sup>1</sup> and Stephen J. White<sup>3\*</sup>.

TNF $\alpha$  strongly upregulates VCAM1 expression in static cultures of ECs<sup>1</sup> and we previously confirmed this in HCAECs<sup>2</sup>, defining 5 ng/ml as a maximally effective concentration and 16 hours as an optimal time point (supplementary figures 1, 2). Additionally, TNF $\alpha$  caused a sustained increase in intracellular ROS production, measured in HCAECs 24 hours post treatment (supplementary figures 3A, 3B). While CSE did not increase intracellular ROS production, it significantly enhanced the effect of TNF $\alpha$  alone (Supplementary figure 3C). Neither treatment caused any increase in apoptosis measured by PARP cleavage, nor was there detectable cytotoxicity (ref<sup>2</sup> and associated supplementary data). Based on these data, 5 ng/ml of TNF $\alpha$  and 10% v/v CSE were used in subsequent experiments

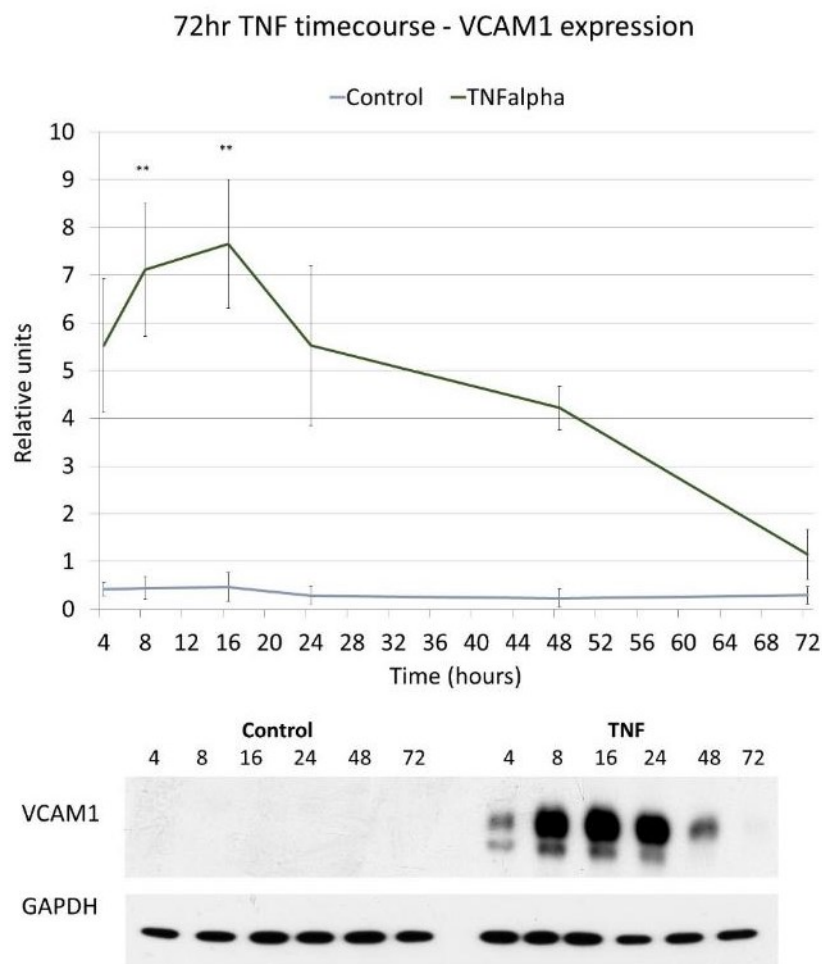

Supplementary figure 1. A time course of VCAM1 protein expression in static HCAECs exposed to TNF $\alpha$  over 72 hours. VCAM1 protein expression was quantified using western blot analysis, expressed as mean fold change against control  $\pm$  S.E. n=3. \*\* P<0.01 vs control.

CSE-induced VCAM1 protein expression in static HCAECs over 72 hours

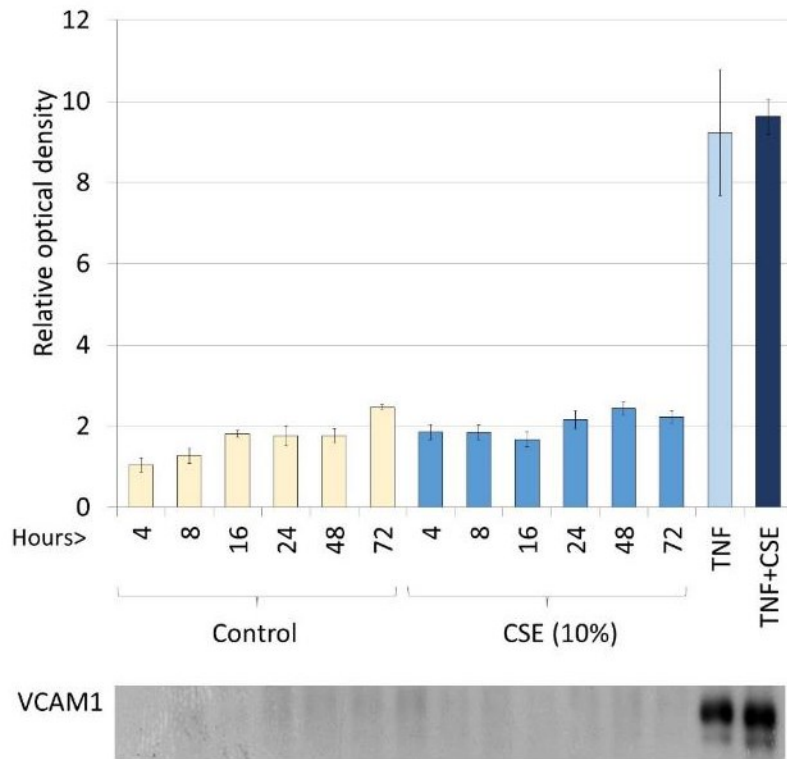

Supplementary figure 2. VCAM1 protein expression in static HCAECs exposed to CSE over 72 hours, with TNF $\alpha$  or TNF $\alpha$  + CSE positive controls. VCAM1 protein expression was quantified using western blot analysis, expressed as mean fold change against control  $\pm$  S.E. n=3.

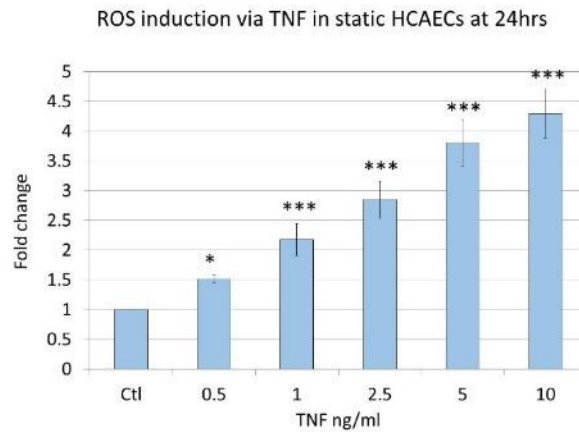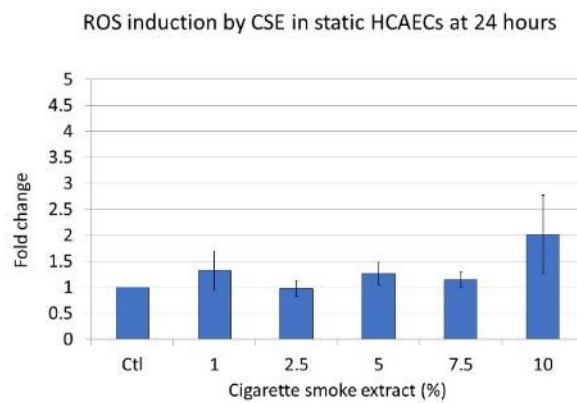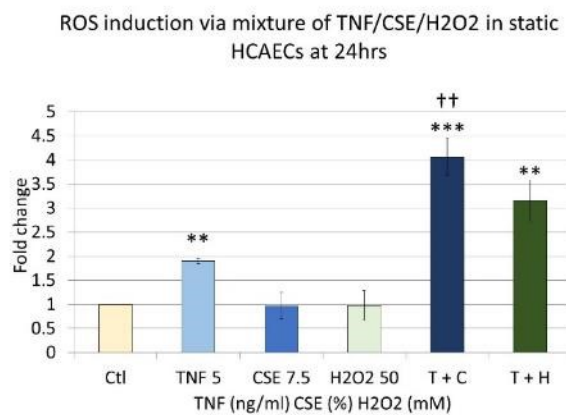

Supplementary figure 3. Induction of reactive oxygen species in static HCAECs exposed to TNF $\alpha$  and CSE. A, 24hr exposure to TNF $\alpha$  in static HCAECs, ROS expression was quantified using DCF-DA fluorescence, expressed as mean fold change against control  $\pm$  S.E. n=4. \* P<0.05 compared to control; \*\*\* P<0.001 compared to control. B, 24hr exposure to CSE in static HCAECs. ROS expression was quantified using DCF-DA fluorescence, expressed as mean fold change against control  $\pm$  S.E. n=4. C. Induction of reactive oxygen species in static HCAECs exposed to TNF $\alpha$ , CSE and H2O2 and their combination. ROS expression was quantified using DCF-DA fluorescence, expressed as mean fold change against control  $\pm$  S.E. n=4.\* P<0.05 compared to supplemented control; †† P<0.01 vs TNF $\alpha$  alone.

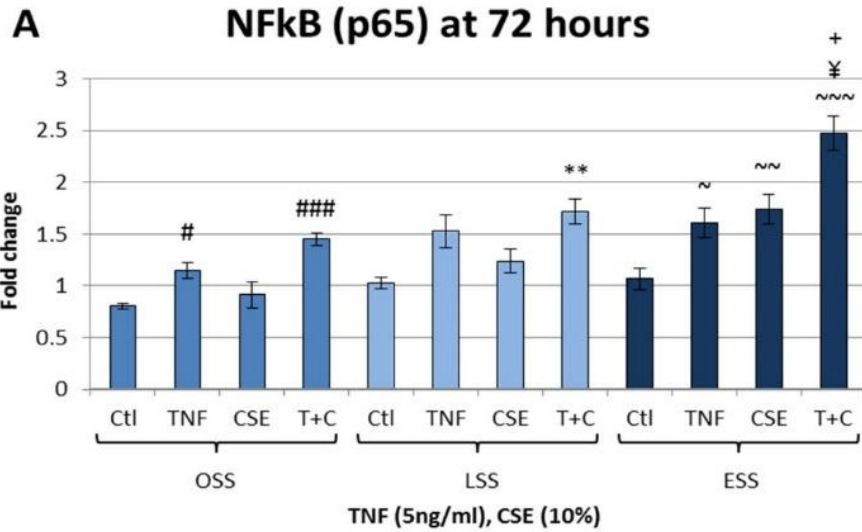

Supplementary figure 4. NFkB (P65) mRNA expression in HCAECs exposed to TNF $\alpha$ , CSE or TNF $\alpha$  and CSE together (T+C) under OSS, LSS or ESS conditions for 72 hours. NFkB p65 mRNA expression was quantified using western blotting analysis, expressed as mean fold change against control  $\pm$  S.E. n=3. ### P<0.001 vs OSS control; \*\* P<0.01 vs LSS control; ~ P<0.001 vs ESS control; ¥ P<0.05 vs ESST; + P<0.05 vs ESSC.

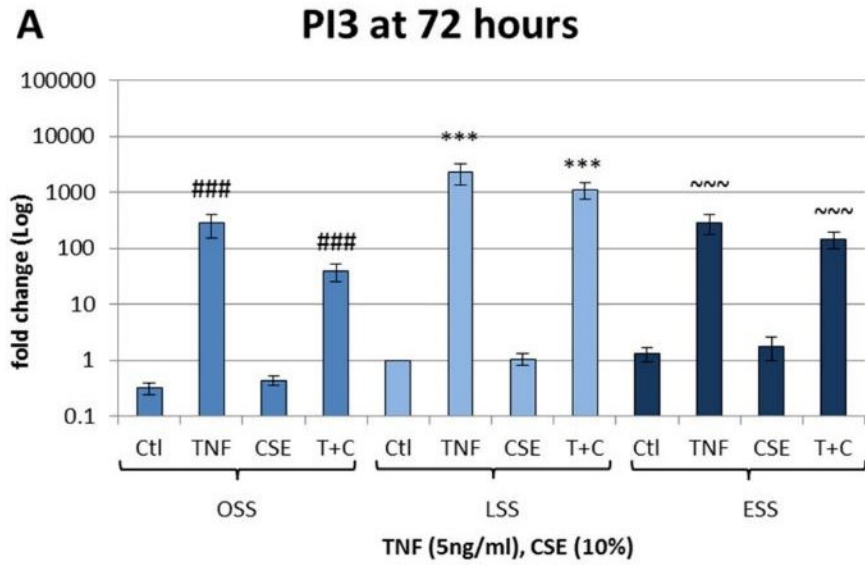

Supplementary figure 5. PI3 mRNA expression in HCAECs exposed to TNF $\alpha$ , CSE or TNF $\alpha$  and CSE together (T+C) under OSS, LSS or ESS conditions for 72 hours. PI3 mRNA expression was quantified using real-time PCR, expressed as mean fold change against control  $\pm$  S.E. n=6. ### P<0.001 vs OSS control; \*\*\* P<0.001 vs LSS control; ~~~ P<0.001 vs ESS control. n=6

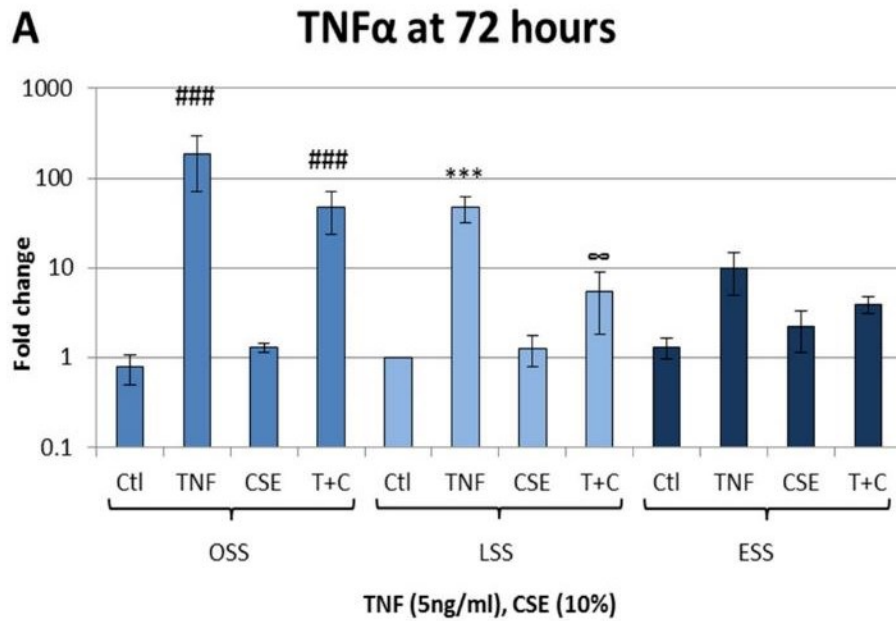

Supplementary figure 6. TNF $\alpha$  mRNA expression in HCAECs exposed to TNF $\alpha$ , CSE or TNF $\alpha$  and CSE together (T+C) under OSS, LSS or ESS conditions for 72 hours. TNF $\alpha$  mRNA expression was quantified using real-time PCR, expressed as mean fold change against control  $\pm$  S.E. n=6. ### P<0.001 vs OSS control; \*\*\* P<0.001 vs LSS control;  $\infty$  P<0.05 vs LSS control. n=6

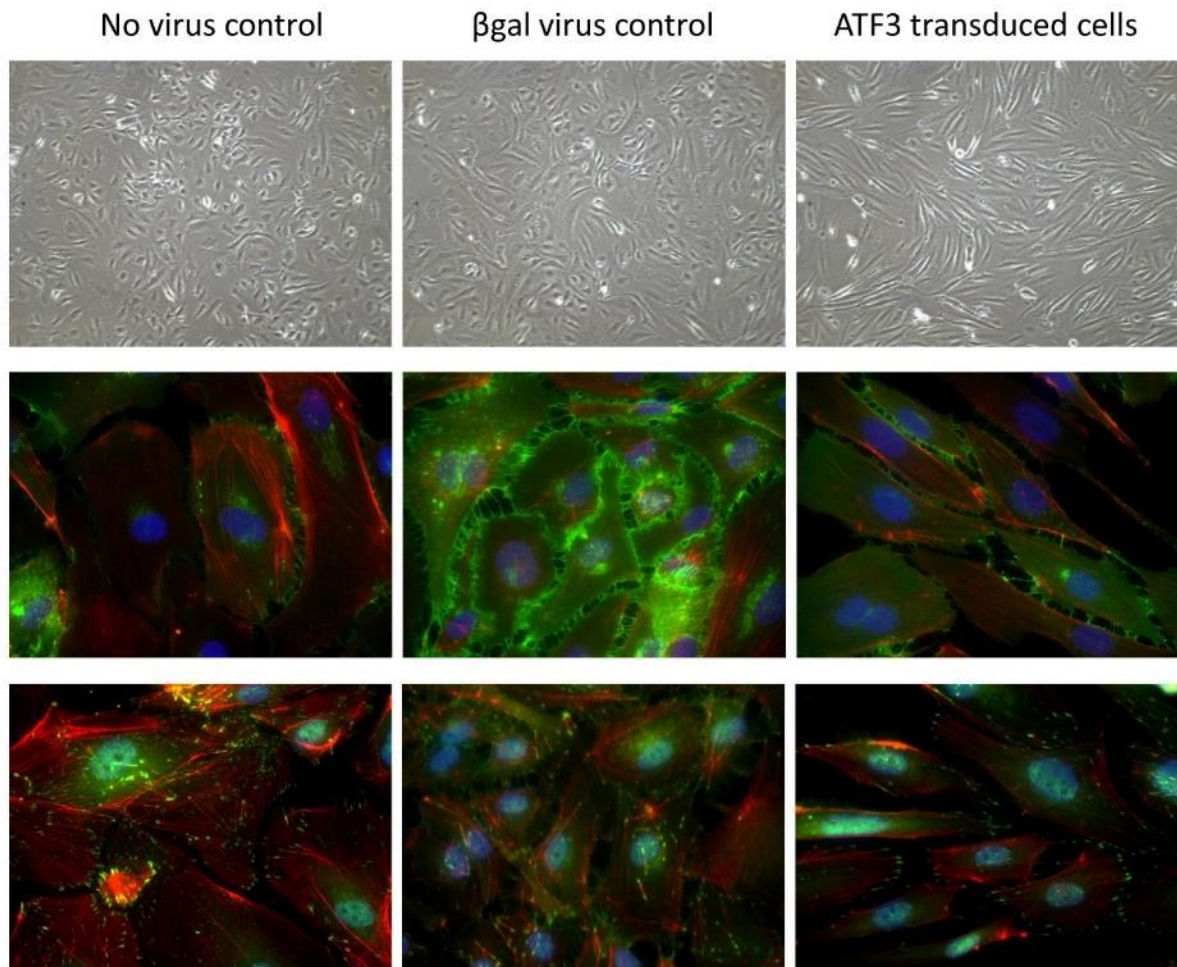

Supplementary figure 7. ATF3 overexpression consistently induced a morphological change in endothelial cells. A, B, C – phase contrast images of HCAEC, A) no virus control; B) βgal virus control (300pfu/cell) C) AdATF3 (300pfu/cell). D, E, F – VE-cadherin (green) and Phalloidin (Red). G, H, I – Vinculin (green) and Phalloidin (Red).

Supplementary methods

Primer sequences

| Code   | Gene                  | Sequence                           | Anneal (°C) | Extension (Sec) |
|--------|-----------------------|------------------------------------|-------------|-----------------|
| SW381  | ATF3                  | CCCTCCTGGGTCACCTGGTGT              | 62          | 15              |
| SW382  | ATF3                  | CTTCAGGGGCTACCTCGGCT               | 62          | 15              |
| SW706F | ATF3-cloning          | GCGAGATCTGGAGCACCATGATGCTTCAACACCC | 65          | 60              |
| SW707R | ATF3-cloning          | CACGCTAGCTTAGCTCTGCAATGTTCTTC      | 65          | 60              |
| SW704F | CCL2                  | ATCCCCAAGGGCTCGCTCAG               | 62          | 15              |
| SW705R | CCL2                  | ACTTCTGCTTGGGGTCAGCACA             | 62          | 15              |
| SW718  | CX3CL1                | CTGTCGTGGCTGCTCCGCTT               | 62          | 15              |
| SW719  | CX3CL1                | TCGGGTCGGCACAGAACAGC               | 62          | 15              |
| SW204  | eNOS                  | GCCGGAACAGCACAAGAGT                | 60          | 30              |
| SW205  | eNOS                  | GAGGATGCCAAGGCCGC                  | 60          | 30              |
| SW767  | E-SELECTIN            | CTGGGCTCCAGGTGAACCCAAC             | 62          | 20              |
| SW768  | E-SELECTIN            | CCGTGGCCACTGCAGGATGTA              | 62          | 20              |
| SW180  | GAPDH                 | CGGATTTGGTCGTATTGGGCG              | 60          | 30              |
| SW181  | GAPDH                 | GCCTTCTCCATGGTGGTGAAGAC            | 60          | 30              |
| SW754  | GCLM                  | GTCCTTGGAGTTGCACAGCTGGA            | 62          | 20              |
| SW755  | GCLM                  | GGCATCACACAGCAGGAGGCA              | 62          | 20              |
| SW226F | HMOX1                 | TCAGGCAGAGGGTGATAGAAGAGG           | 60          | 30              |
| SW227R | HMOX1                 | GCCACCAGAAAGCTGAGTGTAAAGG          | 60          | 30              |
| SW252  | ICAM1                 | CTAAAGGATGGCACTTTCCCACTG           | 62          | 20              |
| SW253  | ICAM1                 | CCTTTTTGGGCCTGTTGTAGTCTG           | 62          | 20              |
| SW740  | I $\kappa$ B $\alpha$ | CGCCCAAGCACCCGGATACA               | 62          | 20              |
| SW741  | I $\kappa$ B $\alpha$ | AACGTCAGACGCTGGCCTCC               | 62          | 20              |
| SW218  | KLF2                  | GTGAGAAGCCCTACCACTGCAACT           | 60          | 30              |
| SW219  | KLF2                  | CCGTTTCTCTGGGTCCAATAAATA           | 60          | 30              |
| SW369  | KLF4                  | TGGACCCCTCTCAGCAATG                | 60          | 30              |
| SW370  | KLF4                  | CTCTTGGTAATGGAGCGGCG               | 60          | 30              |
| SW771  | NF $\kappa$ B (RelA)  | GAAAGGACTGCCGGGATGGCT              | 62          | 20              |
| SW772  | NF $\kappa$ B (RelA)  | GTAGTCCCCACGCTGCTCTTCT             | 62          | 20              |
| SW716  | NOV                   | TGGTGCGGCCCTGTGAACAA               | 62          | 15              |
| SW717  | NOV                   | AGCGGCCATCACTGCAGACC               | 62          | 15              |
| SW496F | NQO1                  | CTAGTTCCGGCCAGGGTCGC               | 62          | 20              |
| SW497R | NQO1                  | TCCGACTCCACCACCTCCCA               | 62          | 20              |
| SW748  | OSGIN1                | GGGAGCCTGGCACTCCATCG               | 62          | 15              |
| SW749  | OSGIN1                | CCCGGCTGTTGCGAAGACCT               | 62          | 15              |
| SW671  | PI3                   | CCTCATCGCTGGGACGCTGG               | 62          | 15              |
| SW672  | PI3                   | GGGAGGAGCCAGGCTTAGT                | 62          | 15              |
| SW756  | SRXN1                 | GCCAAGGTGCAGAGCCTCGT               | 62          | 15              |
| SW757  | SRXN1                 | GCGGGGATGGTCTCTCGCTG               | 62          | 15              |



|       |              |                          |    |    |
|-------|--------------|--------------------------|----|----|
| SW373 | THMB         | CAACACACAGGGTGGCTTCG     | 60 | 30 |
| SW374 | THMB         | GGCTGGACAGGCAGTCTGGT     | 60 | 30 |
| SW541 | TNF $\alpha$ | TCGAACCCCGAGTGACAAGCC    | 62 | 20 |
| SW542 | TNF $\alpha$ | CTGGTAGGAGACGGCGATGCG    | 62 | 20 |
| SW232 | VCAM1        | GAACCCAAACAAAGGCAGAGTACG | 60 | 30 |
| SW233 | VCAM1        | TGCTTCTCCAGCCTGGTTAATTC  | 60 | 30 |

- 1 Wellicome, S. M. *et al.* A monoclonal antibody that detects a novel antigen on endothelial cells that is induced by tumor necrosis factor, IL-1, or lipopolysaccharide. *J. Immunol* **144**, 2558-2565 (1990).
- 2 Teasdale, J. E., Newby, A. C., Timpson, N. J., Munafò, M. R. & White, S. J. Cigarette smoke but not electronic cigarette aerosol activates a stress response in human coronary artery endothelial cells in culture. *Drug Alcohol Depend.* **163**, 256-260, doi:<http://dx.doi.org/10.1016/j.drugalcdep.2016.04.020> (2016).
